# Supplementary material
Source: PubMed Central journal article supplement (PMC7545311)
Supplement: mmc1.pdf [file mmc1.pdf]

## 7 Supplementary materials

### 7.1 Supplementary Tables

**Supplementary Table 1: Framework notation**

| Codes        | Descriptions                                                                                                                                                                                        |
|--------------|-----------------------------------------------------------------------------------------------------------------------------------------------------------------------------------------------------|
|              | REGION ( <i>i</i> )                                                                                                                                                                                 |
| CHN          | China                                                                                                                                                                                               |
| IND          | India                                                                                                                                                                                               |
| NAM          | North America: US, Canada and Mexico                                                                                                                                                                |
| BRZ          | Brazil                                                                                                                                                                                              |
| NAD          | North Asia developed: Japan, South Korea and Taiwan                                                                                                                                                 |
| CIS          | The Commonwealth of Independent States: Armenia, Azerbaijan, Belarus, Kazakhstan, Kyrgyzstan, Moldova, Russia, Tajikistan, Uzbekistan, Turkmenistan, Ukraine and Georgia                            |
| WEU          | Western Europe: Austria, Belgium, Cyprus, France, Finland, Germany, Greece, Italy, Ireland, Luxembourg, Malta, Netherlands, Portugal, Spain, Slovenia, Denmark, Sweden, UK, Norway, and Switzerland |
| REU          | Rest of Europe: Turkey and Baltic Nations                                                                                                                                                           |
| SEA          | Southeast Asia: Philippine, Malaysia, Vietnam, Thailand, Singapore, Indonesia and other minor countries                                                                                             |
| OTH          | Others: Africa, other C&S America, other sub-Indian continent, Oceania, other Middle East, and GCC countries                                                                                        |
| WTO          | The world (Aggregate all regions)                                                                                                                                                                   |
|              | TYPE ( <i>j</i> )                                                                                                                                                                                   |
| LDV          | Vehicles weighting 0-6t in North America, and 0-3.5t for all other regions                                                                                                                          |
| HDV          | Vehicles weighting over 6t in North America, and over 3.5t for all other regions. This category does not include passenger vehicles                                                                 |
| BUS          | Passenger vehicles over 6t. MiniBus (Bus below 6t) are counted as HDV. This is consistent with LMCA definition                                                                                      |
|              | POWER ( <i>k</i> )                                                                                                                                                                                  |
| ICE - PETROL | Internal combustion only / petrol powered                                                                                                                                                           |
| ICE - DIESEL | Internal combustion only / diesel powered                                                                                                                                                           |
| HEV          | HEV (Mild hybrid electric vehicle + Full hybrid electric vehicle). Split between diesel and petrol where applicable.                                                                                |

|       |                                                                                                                         |
|-------|-------------------------------------------------------------------------------------------------------------------------|
| PHEV  | Plug in hybrid electric vehicle (including extended range EV (REEV)). Split between diesel and petrol where applicable. |
| BEV   | Battery electric vehicle                                                                                                |
| FCEV  | Fuel cell electric vehicle                                                                                              |
| PFCEV | Plug in fuel cell electric vehicle                                                                                      |

---

YEAR ( $t$ ) (2015-2030)

---

FUELS ( $f$ )

---

|     |             |
|-----|-------------|
| ELE | Electricity |
| PET | Petrol      |
| DIE | Diesels     |
| HYD | Hydrogen    |

---

POWER SOURCES ( $s$ )

---

|     |     |
|-----|-----|
| COA | Coa |
| GAS | Gas |
| OIL | Oil |

---

METALS ( $m$ )

---

|    |           |
|----|-----------|
| CU | Copper    |
| LI | Lithium   |
| CO | Cobalt    |
| NI | Nickel    |
| MN | Manganese |
| CR | Chrome    |
| FE | Steel     |
| AL | Aluminium |

---

**Supplementary Table 2: Predefined roadmap for sale share by powertrains for LDV in China**

| Power train | 2018 | 2019 | 2020 | 2021 | 2022 | 2023 | 2024 | 2025 | 2026 | 2027 | 2028 | 2029 | 2030 |
|-------------|------|------|------|------|------|------|------|------|------|------|------|------|------|
| ICE PETROL  | 0.92 | 0.9  | 0.88 | 0.86 | 0.85 | 0.83 | 0.82 | 0.79 | 0.7  | 0.61 | 0.51 | 0.42 | 0.32 |
| ICE DIESEL  | 0.01 | 0.01 | 0.01 | 0.01 | 0.01 | 0.01 | 0.01 | 0.01 | 0.01 | 0.01 | 0.01 | 0.01 | 0.0  |
| HEV         | 0.0  | 0.0  | 0.0  | 0.0  | 0.0  | 0.0  | 0.0  | 0.01 | 0.09 | 0.18 | 0.26 | 0.35 | 0.44 |
| PHEV        | 0.02 | 0.03 | 0.03 | 0.04 | 0.05 | 0.05 | 0.06 | 0.05 | 0.05 | 0.05 | 0.05 | 0.05 | 0.05 |
| BEV         | 0.04 | 0.06 | 0.07 | 0.08 | 0.09 | 0.1  | 0.11 | 0.13 | 0.14 | 0.15 | 0.17 | 0.18 | 0.19 |
| FCEV        | 0.0  | 0.0  | 0.0  | 0.0  | 0.0  | 0.0  | 0.0  | 0.0  | 0.0  | 0.0  | 0.0  | 0.0  | 0.0  |
| PFCEV       | 0.0  | 0.0  | 0.0  | 0.0  | 0.0  | 0.0  | 0.0  | 0.0  | 0.0  | 0.0  | 0.0  | 0.0  | 0.0  |

**Supplementary Table 3: Assumed fuel prices by regions (including taxes)**

|                          | BRZ   | CHN   | CIS   | IND   | NAD   | NAM   | REU   | SEA   | WEU   |
|--------------------------|-------|-------|-------|-------|-------|-------|-------|-------|-------|
| Diesel (2017) (\$/l)     | 0.89  | 0.78  | 0.57  | 0.81  | 0.57  | 0.7   | 1.23  | 0.7   | 1.28  |
| Diesel (2030) (\$/l)     | 1.04  | 0.85  | 0.62  | 0.88  | 0.62  | 0.83  | 1.28  | 0.81  | 1.28  |
| Diesel (CAGR)            | 1.2%  | 0.7%  | 0.6%  | 0.6%  | 0.6%  | 1.3%  | 0.3%  | 1.1%  | 0%    |
| Electric (2017) (\$/kWh) | 0.24  | 0.13  | 0.14  | 0.14  | 0.19  | 0.12  | 0.24  | 0.19  | 0.24  |
| Electric (2030) (\$/kWh) | 0.3   | 0.17  | 0.18  | 0.18  | 0.25  | 0.15  | 0.3   | 0.25  | 0.3   |
| Electric (CAGR)          | 1.7%  | 2.1%  | 2%    | 2%    | 2.1%  | 1.7%  | 1.7%  | 2.1%  | 1.7%  |
| Hydrogen (2017) (\$/kg)  | 12.06 | 12.06 | 12.45 | 12.45 | 8.59  | 12.45 | 12.06 | 12.45 | 12.45 |
| Hydrogen (2030) (\$/kg)  | 6.08  | 6.08  | 6.28  | 6.28  | 4.33  | 6.28  | 6.08  | 6.28  | 6.28  |
| Hydrogen (CAGR)          | -5.1% | -5.1% | -5.1% | -5.1% | -5.1% | -5.1% | -5.1% | -5.1% | -5.1% |
| Petrol (2017) (\$/l)     | 1.07  | 0.84  | 0.61  | 0.95  | 1.06  | 0.67  | 1.27  | 0.92  | 1.41  |
| Petrol (2030) (\$/l)     | 1.16  | 0.9   | 0.64  | 1     | 1.12  | 0.8   | 1.28  | 0.99  | 1.37  |
| Petrol (CAGR)            | 0.6%  | 0.5%  | 0.3%  | 0.4%  | 0.4%  | 1.3%  | 0.1%  | 0.5%  | -0.2% |

Sources: CRU internal reports and authors' own assumptions.

**Supplementary Table 4: Vehicle representatives**

| Powertrain   | NAD                                                                                                 | NAM                        | WEU                     | CHN                      | IND                 | REU                        | CIS                  | SEA          | BRZ                  |
|--------------|-----------------------------------------------------------------------------------------------------|----------------------------|-------------------------|--------------------------|---------------------|----------------------------|----------------------|--------------|----------------------|
| <b>LDV</b>   |                                                                                                     |                            |                         |                          |                     |                            |                      |              |                      |
| ICE - PETROL | Nissan Sylphy                                                                                       | Toyota Camry               | Volkswagen Golf         | VW Lavidia               | Maruti Suzuki Dzire | Fiat Eaga                  | -                    | Mazda 2      | Volkswagen Brasilia  |
| ICE - DIESEL | modelled                                                                                            | Chevrolet Cruze            | Volkswagen Golf         | modelled                 | Maruti Suzuki Dzire | Volkswagen Golf GT         | Hyundai Santa Fe     | Mazda 2      | Volkswagen Gol       |
| HEV          | Prius HEV                                                                                           | Toyota Camry Hybrid        | Auris Hybrid            | Toyota corolla           | modelled            | Auris Hybrid               | Toyota Camry Hybrid  | Prius HEV    | Toyota Auris         |
| PHEV         | Prius PHEV                                                                                          | Chevrolet Volt             | VW Golf GTE             | BYD Qin                  | modelled            | Volkswagen Golf GT         | Outlander-Mitsubishi | Prius PHEV   | Mitsubishi Outlander |
| BEV          | Nissan Leaf                                                                                         | Tesla 3                    | VW e-Golf               | BAIC EU260 EV            | Mahindra eVerito D6 | VW e-Golf                  | LADA Ellada          | Nissan Leaf  | BMW i3               |
| FCEV         | Toyota Mirai                                                                                        | Toyota Mirai               | Toyota Mirai            | modelled                 | Toyota Mirai        | Toyota Mirai               | Toyota Mirai         | Toyota Mirai | Toyota Mirai         |
| PFCEV        | modelled                                                                                            | modelled                   | modelled                | modelled                 | modelled            | modelled                   | modelled             | modelled     | modelled             |
| <b>HDV</b>   |                                                                                                     |                            |                         |                          |                     |                            |                      |              |                      |
| ICE - DIESEL | Hino 195                                                                                            | Freightliner M2 106        | MAN TGM 18.280          | Dongfeng KL              | Tata LPD 1618       | MAN TGM 18.280             | Kamaz 53605          | FUSO FN65FJ  | Mercedes Benz 2426   |
| BEV FCEV     | Mercedes Urban eTruck (or modelled on Mercedes Urban eTruck) Nikola One (or modelled on Nikola One) |                            |                         |                          |                     |                            |                      |              |                      |
| <b>BUS</b>   |                                                                                                     |                            |                         |                          |                     |                            |                      |              |                      |
| ICE - DIESEL | Mitsubishi Fuso-Aero Bus                                                                            | New Flyer Xcelsior D40LF   | MAN Lion's City A21     | Yutong ZK6128HG          | Tata Marcopolo      | Solaris Urbino 12          | LiAZ-5292            | Volvo B8R    | Mercedes Benz 2426   |
| HEV          | Selega R HIMR                                                                                       | New Flyer Xcelsior DE40LF  | MAN Lion's City hybrid  | Yutong ZK6126HGZ1        | Tata hybrid bus     | Solaris Urbino 12 Hybrid   | LiAZ-5292XX          | Volvo B5RLEH |                      |
| PHEV         | -                                                                                                   | -                          | -                       | Yutong H-12              | -                   | -                          | -                    | -            | -                    |
| BEV          | BYD-K9                                                                                              | Flyer Xcelsior Charge      | BYD K9                  | BYD K9                   | Tata electric bus   | Solaris Urbino 12 Electric | LIAZ-6274            | ByD K9       | modelled             |
| FCEV         | FCHV-BUS2                                                                                           | New Flyer Xcelsior H40 FLR | Van Hool A330 FC Europa | Feichi-Ballard prototype | Tata fuel cell bus  | Van Hool A330 FC Europa    | modelled             | FCHV-BUS2    | modelled             |

**Supplementary Table 5: Assumed lifespan of vehicles and batteries (year)**

| Type | Powertrain    | Life    | BRZ | CHN | CIS | IND | NAD | NAM | OTH | REU | SEA | WEU |
|------|---------------|---------|-----|-----|-----|-----|-----|-----|-----|-----|-----|-----|
| LDV  | BEV           | Vehicle | 10  | 8   | 12  | 12  | 10  | 9   |     | 11  | 10  | 10  |
|      |               | Battery | 7   | 5   | 7   | 7   | 7   | 9   |     | 7   | 6   | 7   |
|      | FCEV          | Vehicle | 10  | 8   | 12  | 12  | 10  | 9   |     | 11  | 10  | 10  |
|      |               | Battery | 10  | 5   | 10  | 5   | 10  | 9   |     | 10  | 10  | 10  |
|      | HEV           | Vehicle | 10  | 8   | 12  | 12  | 10  | 9   |     | 11  | 10  | 10  |
|      |               | Battery | 7   | 5   | 7   | 7   | 7   | 9   |     | 7   | 6   | 7   |
|      | ICE<br>DIESEL | Vehicle | 10  | 8   | 12  | 12  | 10  | 9   | 10  | 11  | 10  | 10  |
|      |               | Battery | 2   | 3   | 3   | 3   | 3   | 9   | 3   | 3   | 2   | 3   |
|      | ICE<br>PETROL | Vehicle | 10  | 8   | 12  | 12  | 10  | 9   | 10  | 11  | 10  | 10  |
|      |               | Battery | 2   | 3   | 3   | 3   | 3   | 9   | 3   | 3   | 2   | 3   |
|      | PFCEV         | Vehicle | 10  | 8   | 12  | 12  | 10  | 9   |     | 11  | 10  | 10  |
|      |               | Battery | 10  | 5   | 10  | 5   | 10  | 9   |     | 10  | 10  | 10  |
| PHEV | Vehicle       | 10      | 8   | 12  | 12  | 10  | 9   |     | 11  | 10  | 10  |     |
|      | Battery       | 7       | 5   | 7   | 7   | 7   | 9   |     | 7   | 6   | 7   |     |
| HDV  | BEV           | Vehicle | 15  | 13  | 17  | 15  | 13  | 15  |     | 13  | 14  | 12  |
|      |               | Battery | 7   | 5   | 7   | 7   | 7   | 15  |     | 7   | 6   | 7   |
|      | FCEV          | Vehicle | 15  | 13  | 17  | 15  | 13  | 15  |     | 13  | 14  | 12  |
|      |               | Battery | 10  | 5   | 10  | 5   | 10  | 15  |     | 10  | 10  | 10  |
|      | ICE<br>DIESEL | Vehicle | 15  | 13  | 17  | 15  | 13  | 15  | 14  | 13  | 14  | 12  |
|      |               | Battery | 2   | 3   | 3   | 3   | 3   | 15  | 3   | 3   | 2   | 3   |
| BUS  | BEV           | Vehicle | 12  | 10  | 12  | 12  | 10  | 10  |     | 11  | 12  | 10  |
|      |               | Battery | 7   | 5   | 7   | 7   | 7   | 9   |     | 7   | 6   | 7   |
|      | FCEV          | Vehicle | 12  | 10  | 12  | 12  | 10  | 10  |     | 11  | 12  | 10  |
|      |               | Battery | 10  | 5   | 10  | 5   | 10  | 9   |     | 10  | 10  | 10  |
|      | HEV           | Vehicle | 12  | 10  | 12  | 12  | 10  | 10  |     | 11  | 12  | 10  |
|      |               | Battery | 7   | 5   | 7   | 7   | 7   | 9   |     | 7   | 6   | 7   |
|      | ICE<br>DIESEL | Vehicle | 12  | 10  | 12  | 12  | 10  | 10  | 10  | 11  | 12  | 10  |
|      |               | Battery | 2   | 3   | 3   | 3   | 3   | 9   | 3   | 3   | 2   | 3   |
|      | PHEV          | Vehicle | 12  | 10  | 12  | 12  | 10  | 10  |     | 11  | 12  | 10  |
|      |               | Battery | 7   | 5   | 7   | 7   | 7   | 9   |     | 7   | 6   | 7   |

Sources: CRU internal reports and authors' own assumptions.

**Supplementary Table 6: Assumed annual millage travelled (km)**

| Type | BRZ     | CHN     | CIS     | IND     | NAD     | NAM     | REU     | SEA     | WEU     |
|------|---------|---------|---------|---------|---------|---------|---------|---------|---------|
| LDV  | 12,983  | 19,400  | 16,882  | 12,200  | 12,356  | 21,687  | 12,276  | 14,853  | 13,788  |
| HDV  | 100,000 | 100,000 | 100,000 | 100,000 | 100,000 | 100,000 | 100,000 | 100,000 | 100,000 |
| BUS  | 53,226  | 55,000  | 60,000  | 52,500  | 51,499  | 53,226  | 55,200  | 50,000  | 51,658  |

Sources: CRU internal reports and authors' own assumptions.

**Supplementary Table 7: Assumed Average Fuel Efficiency CAGR, 2015-2030**

| Powertrain   | NAD   | NAM   | WEU   | CHN   | IND   | REU   | CIS   | SEA   | BRZ   |
|--------------|-------|-------|-------|-------|-------|-------|-------|-------|-------|
| <b>LDV</b>   |       |       |       |       |       |       |       |       |       |
| ICE - PETROL | 2.30% | 3.00% | 2.20% | 2.20% | 1.60% | 2.20% | 1.60% | 1.70% | 2.20% |
| ICE - DIESEL | 2.00% | 3.00% | 2.20% | 2.20% | 1.50% | 2.20% | 1.50% | 1.50% | 2.20% |
| HEV          | 1.70% | 2.40% | 1.70% | 2.20% | 1.60% | 1.70% | 1.60% | 1.70% | 1.70% |
| PHEV         | 2.30% | 3.00% | 2.20% | 2.20% | 1.60% | 2.20% | 1.60% | 1.70% | 2.20% |
| BEV          | 1.50% | 1.50% | 1.50% | 1.40% | 1.50% | 1.50% | 1.50% | 1.50% | 1.50% |
| FCEV         |       |       |       |       | 1.70% |       |       |       |       |
| PFCEV        |       |       |       |       | 1.70% |       |       |       |       |
| <b>HDV</b>   |       |       |       |       |       |       |       |       |       |
| ICE - DIESEL | 0.90% | 1.10% | 1.60% | 1.10% | 2.90% | 1.10% | 1.10% | 1.10% | 1.10% |
| BEV          |       |       |       |       | 1.10% |       |       |       |       |
| FCEV         |       |       |       |       | 1.20% |       |       |       |       |
| <b>BUS</b>   |       |       |       |       |       |       |       |       |       |
| ICE - DIESEL |       |       |       |       | 1.00% |       |       |       |       |
| HEV          |       |       |       |       | 1.00% |       |       |       |       |
| PHEV         | -     | -     | -     | 1.00% | -     | -     | -     | -     | -     |
| BEV          |       |       |       |       | 1.20% |       |       |       |       |
| FCEV         |       |       |       |       | 1.50% |       |       |       |       |

**Supplementary Table 8: Assumed maintenance cost as a share of vehicle price (%)**

| Type       | Powertrain | BRZ  |      | CHN  |      | CIS  |      | IND  |      | NAD  |      | NAM  |      | REU  |      | SEA  |      | WEU  |      |
|------------|------------|------|------|------|------|------|------|------|------|------|------|------|------|------|------|------|------|------|------|
|            |            | 2017 | 2030 | 2017 | 2030 | 2017 | 2030 | 2017 | 2030 | 2017 | 2030 | 2017 | 2030 | 2017 | 2030 | 2017 | 2030 | 2017 | 2030 |
| LDV        | BEV        | 6    | 13   | 4    | 10   | 8    | 16   | 7    | 17   | 9    | 16   | 6    | 11   | 10   | 17   | 7    | 14   | 5    | 9    |
|            | FCEV       | 4    | 9    | 3    | 6    | 5    | 11   | 5    | 9    | 4    | 9    | 4    | 8    | 5    | 10   | 4    | 9    | 3    | 6    |
|            | HEV        | 19   | 22   | 11   | 12   | 26   | 30   | 28   | 32   | 17   | 18   | 13   | 14   | 22   | 24   | 19   | 20   | 10   | 11   |
|            | ICE DIESEL | 22   | 23   | 14   | 15   | 31   | 33   | 39   | 42   | 24   | 25   | 15   | 16   | 27   | 29   | 22   | 23   | 13   | 14   |
|            | ICE PETROL | 26   | 27   | 16   | 17   | 37   | 39   | 41   | 44   | 27   | 29   | 17   | 18   | 31   | 33   | 26   | 27   | 13   | 14   |
|            | PFCEV      | 4    | 8    | 3    | 6    | 5    | 10   | 5    | 9    | 4    | 8    | 4    | 7    | 5    | 10   | 4    | 8    | 2    | 5    |
|            | PHEV       | 10   | 15   | 6    | 12   | 17   | 25   | 13   | 20   | 12   | 15   | 8    | 11   | 14   | 16   | 12   | 15   | 7    | 8    |
|            | BEV        | 18   | 25   | 11   | 20   | 12   | 21   | 7    | 13   | 31   | 55   | 17   | 23   | 19   | 35   | 18   | 32   | 17   | 30   |
|            | FCEV       | 14   | 24   | 9    | 19   | 9    | 20   | 6    | 13   | 24   | 52   | 13   | 22   | 16   | 34   | 15   | 32   | 13   | 28   |
|            | ICE DIESEL | 53   | 43   | 53   | 56   | 48   | 51   | 45   | 48   | 66   | 70   | 44   | 36   | 58   | 62   | 54   | 59   | 59   | 63   |
| BUS        | BEV        | 17   | 25   | 23   | 36   | 11   | 21   | 36   | 67   | 14   | 26   | 17   | 25   | 11   | 20   | 18   | 36   | 14   | 20   |
|            | FCEV       | 20   | 37   | 17   | 56   | 16   | 27   | 34   | 63   | 11   | 26   | 20   | 37   | 16   | 27   | 13   | 25   | 15   | 26   |
|            | HEV        | 26   | 28   | 56   | 60   | 23   | 30   | 84   | 157  | 23   | 24   | 26   | 28   | 20   | 22   | 19   | 20   | 17   | 19   |
| ICE DIESEL | 53         | 56   | 109  | 116  | 75   | 80   | 318  | 339  | 51   | 55   | 53   | 56   | 50   | 54   | 62   | 66   | 37   | 40   |      |
| PHEV       |            |      | 50   | 64   |      |      |      |      |      |      |      |      |      |      |      |      |      |      |      |

**Supplementary Table 9: Assumed vehicle values at EOL (USD)**

|     | HEV    |        | PHEV   |        |
|-----|--------|--------|--------|--------|
|     | 2017   | 2030   | 2017   | 2030   |
| BRZ | 22,234 | 20,706 | 14,823 | 13,913 |
| CHN | 15,162 | 14,235 | 11,884 | 11,157 |
| CIS | 14,550 | 10,948 | 7,365  | 6,915  |
| IND | 11,436 | 11,446 | 7,624  | 7,630  |
| NAD | 30,947 | 29,055 | 20,910 | 19,632 |
| NAM | 11,225 | 14,521 | 7,484  | 9,681  |
| REU | 29,538 | 26,032 | 17,475 | 16,407 |
| SEA | 20,821 | 19,549 | 9,664  | 9,073  |
| WEU | 50,831 | 45,466 | 35,389 | 33,226 |

1  
2  
3  
4  
5  
6  
7  
8  
9  
10  
11  
12  
13  
14  
15  
16  
17  
18  
19  
20  
21  
22  
23  
24  
25  
26  
27  
28  
29  
30  
31  
32  
33  
34  
35  
36  
37  
38  
39  
40  
41  
42  
43  
44  
45  
46  
47  
48  
49  
50  
51  
52  
53  
54  
55  
56  
57  
58  
59  
60  
61  
62  
63  
64  
65

**Supplementary Table 10: Assumed Compliance Cost**

| Vehicle type | Powertrain | Region | Year       |        |        |
|--------------|------------|--------|------------|--------|--------|
|              |            |        | 2017       | 2025   | 2030   |
| LDV          | ICE DIESEL | BRZ    | -          | 131    | 128    |
|              |            | CHN    | -          | 713    | 696    |
|              |            | IND    | -          | 1,228  | 1,199  |
|              |            | NAM    | 64         | 62     | 60     |
|              |            | REU    | 246        | 237    | 231    |
|              |            | WEU    | 246        | 237    | 231    |
|              | ICE PETROL | BRZ    | -          | 131    | 128    |
|              |            | CHN    | -          | 66     | 64     |
|              |            | IND    | -          | 246    | 240    |
|              |            | NAM    | 64         | 62     | 60     |
|              |            | SEA    | -          | 56     | 55     |
|              |            | HDV    | ICE DIESEL | BRZ    | -      |
| CHN          | -          |        |            | 2,492  | 2,432  |
| CIS          | -          |        |            | 1,733  | 1,570  |
| IND          | -          |        |            | 2,244  | 2,189  |
| WEU          | 246        |        |            | 1,895  | 2,669  |
| BUS          | ICE DIESEL |        |            | BRZ    | -      |
|              |            | CHN    | -          | 5,464  | 5,331  |
|              |            | CIS    | 1,177      | 1,133  | 1,105  |
|              |            | IND    | -          | 10,540 | 10,284 |
|              |            | REU    | 2,639      | 2,539  | 2,478  |

**Supplementary Table 11: Assumed Annual Circulation Tax (ACT)**

| Power train | Region | 2017   | 2025   | 2030   |
|-------------|--------|--------|--------|--------|
| BEV         | NAM    | 5,340  | 4,561  | 4,131  |
| FCEV        | NAM    | 5,340  | 4,561  | 4,131  |
| HEV         | NAM    | 5,340  | 4,561  | 4,131  |
| ICE DIESEL  | NAD    | 25,287 | 23,333 | 22,190 |
|             | NAM    | 5,340  | 4,561  | 4,131  |
| ICE PETROL  | NAD    | 25,287 | 23,333 | 22,190 |
|             | NAM    | 5,340  | 4,561  | 4,131  |
| PFCEV       | NAM    | 5,340  | 4,561  | 4,131  |
| PHEV        | NAM    | 5,340  | 4,561  | 4,131  |



1  
2  
3  
4  
5  
6  
7  
8  
9  
10  
11  
12  
13  
14  
15  
16  
17  
18  
19  
20  
21  
22  
23  
24  
25  
26  
27  
28  
29  
30  
31  
32  
33  
34  
35  
36  
37  
38  
39  
40  
41  
42  
43  
44  
45  
46  
47  
48  
49  
50  
51  
52  
53  
54  
55  
56  
57  
58  
59  
60  
61  
62  
63  
64  
65

**Supplementary Table 12: Average metal intensities in batteries, kg/kWh (2015-2017)**

| Metal/Component                                                      | NCA  | NMC (1:1:1) | NMC (5:3:2) | NMC (6:2:2) | NMC (8:1:1) | LMO  | LFP  | NiMH |
|----------------------------------------------------------------------|------|-------------|-------------|-------------|-------------|------|------|------|
| Lithium /Cathode +electrolyte                                        | 0.12 | 0.18        | 0.14        | 0.15        | 0.12        | 0.13 | 0.12 |      |
| Cobalt /Cathode                                                      | 0.14 | 0.41        | 0.22        | 0.20        | 0.10        |      |      | 0.17 |
| Nickel /Cathode                                                      | 0.77 | 0.4         | 0.55        | 0.61        | 0.78        |      |      | 4.15 |
| Manganese /Cathode                                                   |      | 0.38        | 0.31        | 0.19        | 0.09        | 1.77 |      |      |
| Aluminium/Cathode                                                    | 0.02 |             |             |             |             |      |      |      |
| Copper/Current collector                                             | 0.51 | 0.77        | 0.70        | 0.70        | 0.70        | 0.91 | 0.82 | 0.40 |
| Aluminium/Current collector                                          | 0.34 | 0.5         | 0.46        | 0.46        | 0.46        | 0.59 | 0.53 | 0.30 |
| Steel casing/Pack                                                    | 2.50 | 2.50        | 2.50        | 2.50        | 2.50        | 2.50 | 2.50 | 2.50 |
| Assumed changes in average metal intensities in batteries, 2015-2030 |      |             |             |             |             |      |      |      |
| Reduction in cathode active materials content (approximate)          | 0.15 | 0.05        | 0.15        | 0.15        | 0.15        | 0.05 | 0.15 | 0.05 |
| Reduction in other metals content (approximate)                      | 0.05 | 0.05        | 0.05        | 0.05        | 0.05        | 0.05 | 0.05 | 0.05 |

\*Note: NiMH - average of NiMH (AB2) and NiMH (AB5).

**Supplementary Table 13: Steel and aluminium content assumptions**

| Metal                 | Vehicle parts                                         | Average intensity (2016), kg/unit                                                                                                     |                             |                                                                                                                                                        |
|-----------------------|-------------------------------------------------------|---------------------------------------------------------------------------------------------------------------------------------------|-----------------------------|--------------------------------------------------------------------------------------------------------------------------------------------------------|
|                       |                                                       | LDV                                                                                                                                   | HDV                         | BUS                                                                                                                                                    |
| Aluminium in battery  | Battery cathode (NCS) and in current collector (foil) | Up to 0.7 in NCA cathode<br>20 in Al current collector                                                                                | 80 in BEV                   | <ul style="list-style-type: none"> <li>• 13 in HEV</li> <li>• 30 in FCEV</li> </ul>                                                                    |
| Aluminium ex. battery | Aluminium body parts body inner structure, radiator   | 150-159                                                                                                                               | 100-120                     | 600-900                                                                                                                                                |
| Steel in battery      | Battery casing                                        | Up to 150 in Tesla                                                                                                                    | 430 in BEV                  | <ul style="list-style-type: none"> <li>• 50-75 in HEV</li> <li>• 125 in FCEV</li> <li>• 500-750 in BEV</li> </ul>                                      |
| Steel ex. battery     | Body, frame, engine, chassis, exhaust system          | 600-800 in ICEs                                                                                                                       | 4600                        | 8,600-11,000                                                                                                                                           |
| Copper in battery     |                                                       | <ul style="list-style-type: none"> <li>• 0.6 in HEV</li> <li>• 10-12 in PHEV</li> <li>• 30-40 in BEV</li> <li>• 7 in PFCEV</li> </ul> | 120 in BEV                  | <ul style="list-style-type: none"> <li>• 15-20 in HEV</li> <li>• 37 in PHEV</li> <li>• 150-250 in BEV</li> <li>• 40 in FCEV</li> </ul>                 |
| Copper ex. battery    |                                                       | <ul style="list-style-type: none"> <li>• 20 in ICE</li> <li>• 30 in HEV</li> <li>• 40-45 in PHEV</li> <li>• 48 in PFCEV</li> </ul>    | 30 in ICE, BEV, FCEV, PFCEV | <ul style="list-style-type: none"> <li>• 40 in ICE</li> <li>• 70 in HEV</li> <li>• 40-48 in BEV</li> <li>• 80 in PHEV, BEV, FCEV &amp; FCEV</li> </ul> |

## 7.2 Supplementary Figures

Supplementary Figure 1: Assumptions on macro variables

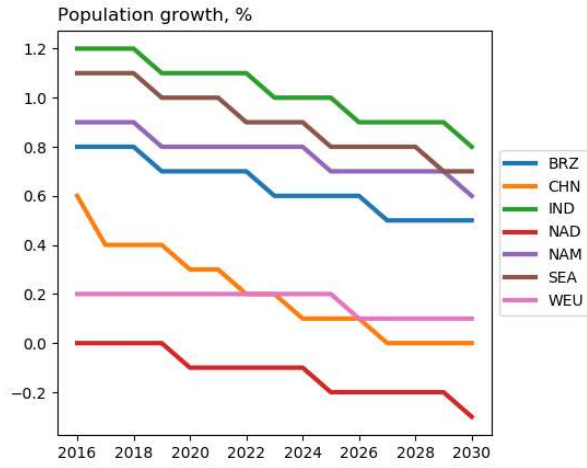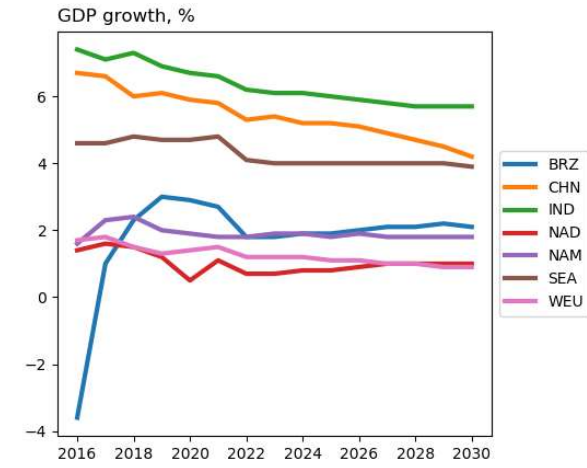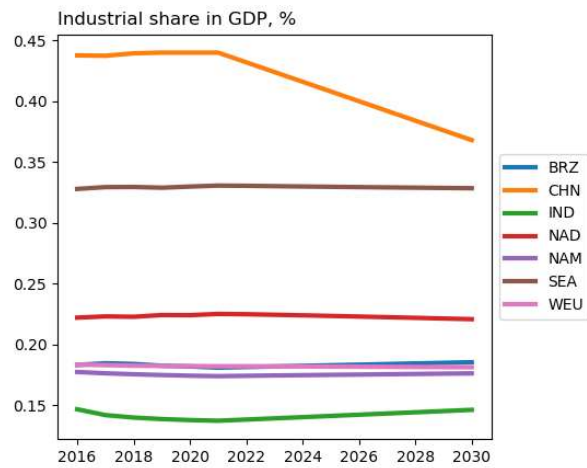

Sources: Oxford Economics

**Supplementary Figure 2: Infrastructure availability assessment**

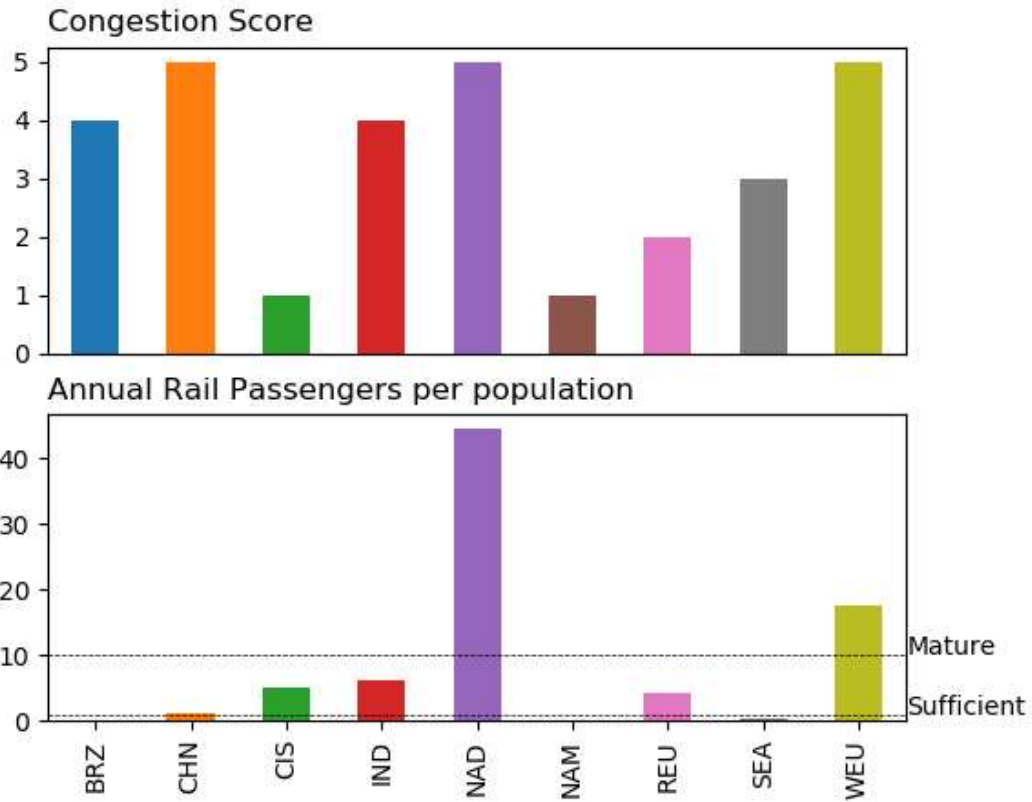

**Supplementary Figure 3: Tailpipe Emissions Standard (Passenger Cars & LDV)**

|                     | 2017                                        | 2018           | 2019               | 2020                                | 2021                     | 2022 | 2023           | 2024 | 2025 |
|---------------------|---------------------------------------------|----------------|--------------------|-------------------------------------|--------------------------|------|----------------|------|------|
| Europe              | EU 6 / RDE Phase 1 / 130g/km CO2            |                |                    | RDE Phase 2 / 95g/km CO2            |                          |      | EU 7           |      |      |
| USA (EPA)           | Tier 3 Phase in: NMOG + NOx, PM tightening  |                |                    |                                     |                          |      |                |      |      |
| USA (CARB)          | LEV III Phase in: NMOG + NOx, PM tightening |                |                    | LEV III: Full vehicle certification |                          |      |                |      |      |
| Japan               | JP 09                                       | JP 18          |                    |                                     |                          |      |                |      |      |
| S. Korea (Gasoline) | K-ULEV 70                                   |                |                    |                                     | LEV III / 97g/km CO2     |      |                |      |      |
| S. Korea (Diesel)   | EU 6b                                       |                | EU 6c/ RDE Phase 1 |                                     | RDE Phase 2 / 97g/km CO2 |      | EU 7           |      |      |
| China               | China 4 (EU 4)                              | China 5 (EU 5) |                    | China 6a                            |                          |      | China 6b / RDE |      |      |
| China (Beijing)     | BJ6                                         |                |                    | China 6b                            |                          |      | China 6b / RDE |      |      |
| India               | BS4 (EU 4)                                  |                |                    | BS 6 (EU 6)                         |                          |      | BS 6 / RDE     |      |      |
| Indonesia           | EU2                                         |                | EU 4               |                                     |                          |      |                |      |      |
| Thailand            | EU 4                                        |                | EU 5               |                                     |                          |      | EU 6           |      |      |
